# Supplementary material for: Structure-based mutagenesis reveals the albumin-binding site of the neonatal Fc receptor
Source: PubMed Central journal article supplement — Nat Commun. 2012 Jan 3;3:610–. doi: 10.1038/ncomms1607 (PMC3272563; doi:10.1038/ncomms1607), 2012-01-03
Supplement: ncomms1607-s1.pdf [file ncomms1607-s1.pdf]

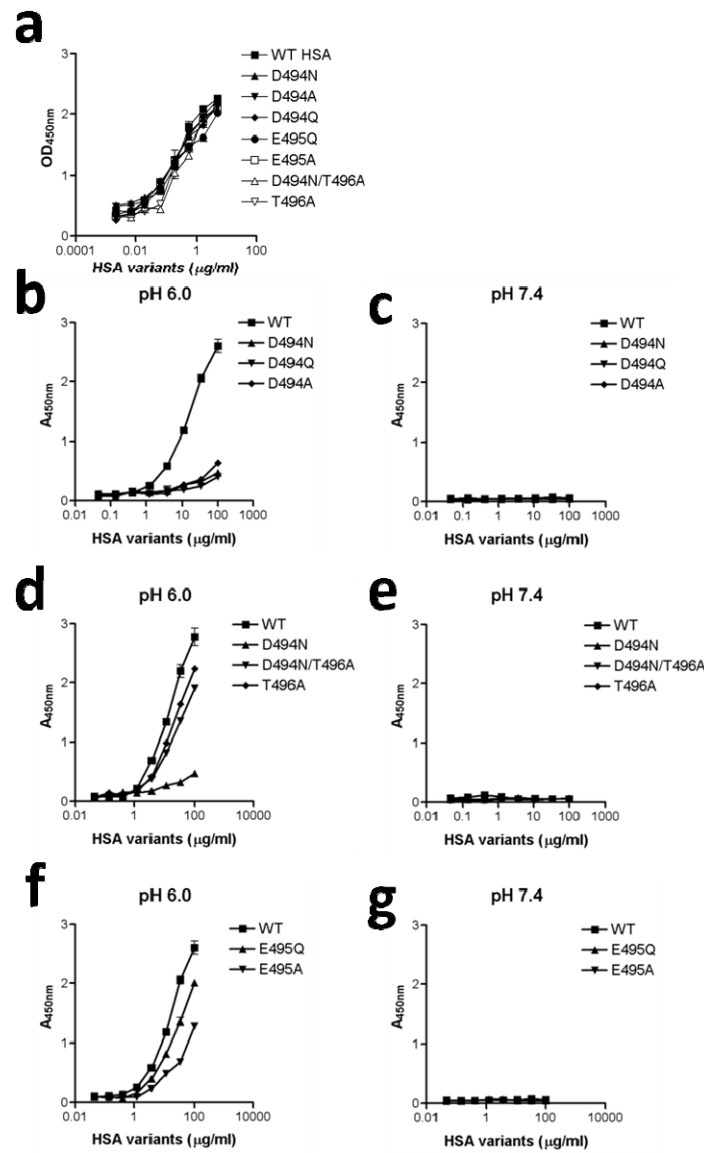

**Supplementary Figure S1. Binding of HSA mutants to hFcRn.** (a) The levels of titrated amounts of HSA variants (5.0-0.002  $\mu\text{g/ml}$ ) directly coated in the wells at pH 6.0 were controlled using a horseradish peroxidase conjugated anti HSA antibody preparation. ELISA responses of HSA WT, D494N, D494Q and D494A binding to hFcRn at (b) pH 6.0 and (c) pH 7.4. ELISA responses of HSA WT, D494N, D494N/T496A and T496A binding to hFcRn at (d) pH 6.0 and (e) pH 7.4. ELISA responses of HSA WT, E495Q and E495A binding to hFcRn at (f) pH 6.0 and (g) pH 7.4. In all FcRn binding experiments titrated amounts (100-0.4  $\mu\text{g ml}^{-1}$ ) of the HSA variants were coated in wells followed by addition of a constant amount of hFcRn-GST (0.5  $\mu\text{g ml}^{-1}$ ). Bound receptor was detected using an HRP-conjugated anti-GST antibody. The values represent the average of triplicates. (a-g)  $n=3-4$ . All data are presented as mean  $\pm$  s.d.

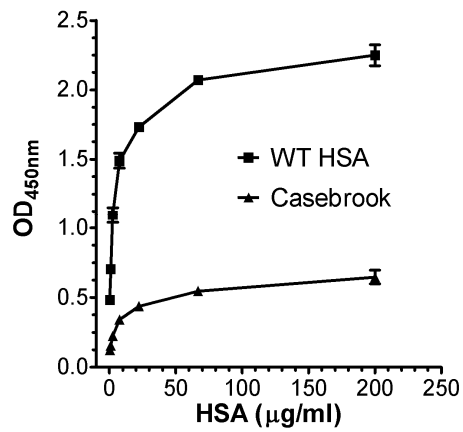

**Supplementary Figure S2. Binding of WT and Casebrook HSA to hFcRn.** ELISA responses showing binding of WT and the Casebrook HSA variant isolated from a heterozygous individual to hFcRn at pH 6.0. Titrated amounts of the HSA variants (200-0.3 µg ml<sup>-1</sup>) were coated in wells followed by adding of a constant amount of hFcRn-GST (0.5 µg ml<sup>-1</sup>). Bound receptor was detected using an HRP-conjugated anti-GST antibody. The values represent the average of triplicates.  $n=3$ . All data are presented as mean  $\pm$  s.d.

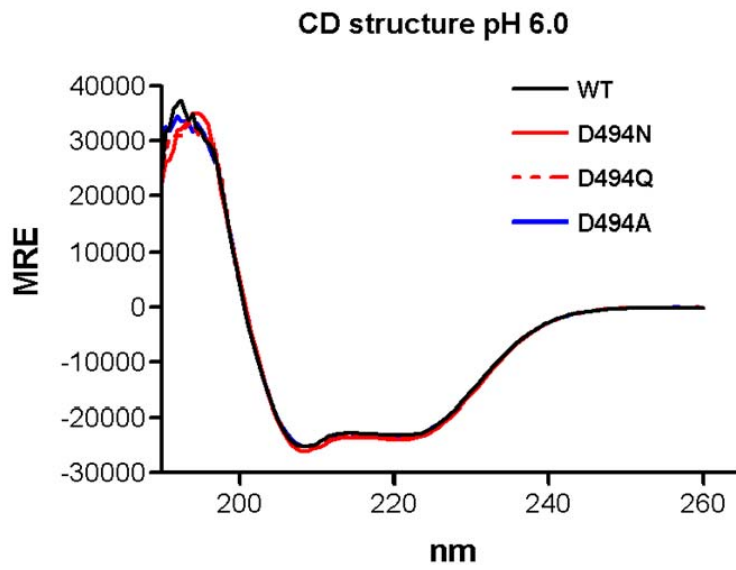

**Supplementary Figure S3. CD spectra for HSA variants.** Representative CD spectra of WT and HSA mutants obtained by CD measurements at pH 6.0. MRE; mean residual ellipticity. The secondary structural elements for each of the HSA variants are summarized in Supplementary Table S1.

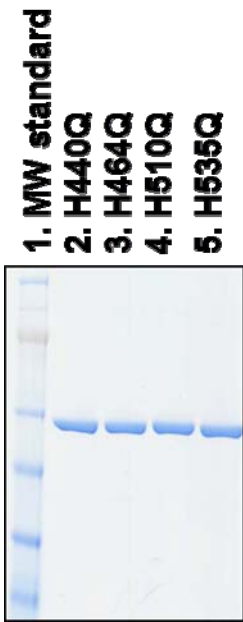

**Supplementary Figure S4. SDS-PAGE analysis of HSA variants.** Equal amounts (1  $\mu\text{g}$ ) of HAS variants (H440Q, H464Q, H510Q and H535Q) were applied on a NuPAGE 4-12% Bis-Tris gel. Electrophoresis was performed for 50 min at 200 V. Gels were stained with InstantBlue protein stain (Expedeon).

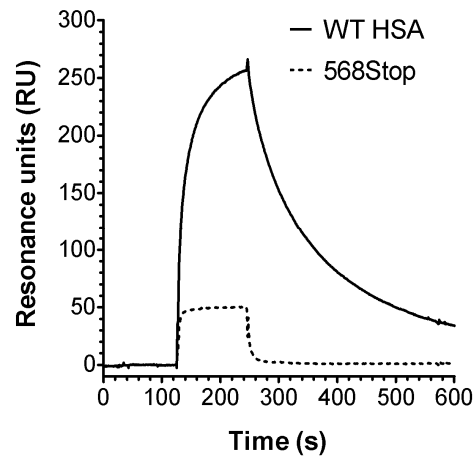

**Supplementary Figure S5. SPR binding responses of HSA variants.** Representative SPR responses obtained when 1  $\mu\text{M}$  of WT HSA and HSA 568Stop (truncated variant that lacks the last 17 a.a.) were injected over immobilized hFcRn (2000 RU) at pH 6.0. Injections were performed at 25  $^{\circ}\text{C}$  with flow rate of 50  $\mu\text{l min}^{-1}$ .

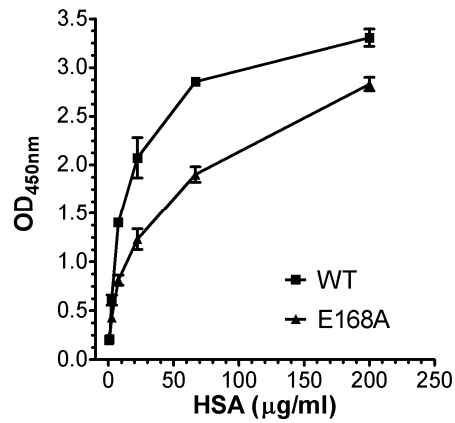

**Supplementary Figure S6. Binding of hFcRn variants to HSA.** ELISA responses showing binding of (0.5 μg ml<sup>-1</sup>) hFcRn WT and hFcRn E168A to titrated amounts of the WT HSA (200-0.3 μg ml<sup>-1</sup>) coated in wells. The ELISA was performed at pH 6.0 and bound receptors were detected using an HRP-conjugated anti-GST antibody. The values represent the average of triplicates.  $n=3$ . All data are presented as mean ± s.d.

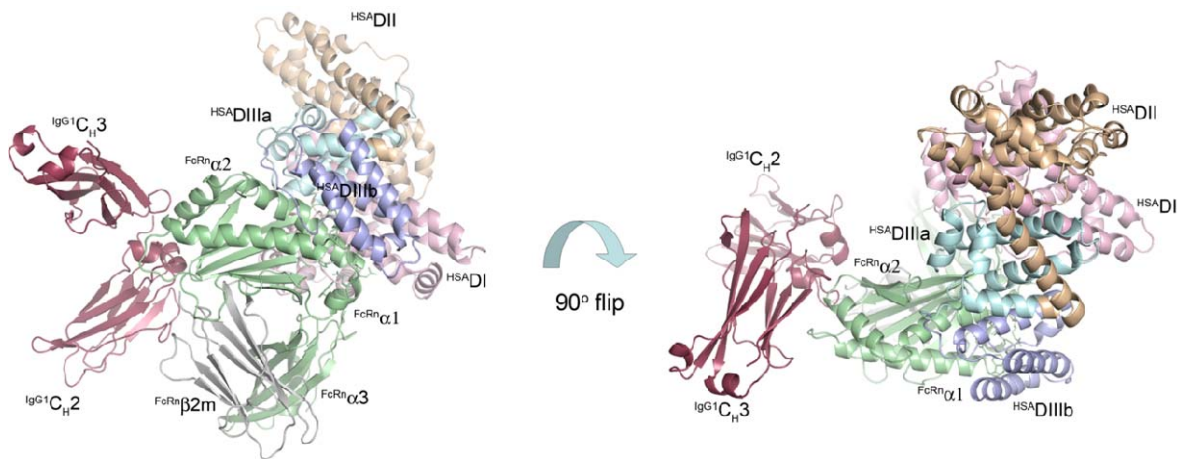

**Supplementary Figure S7. A structural model of IgG and HSA bound to hFcRn.** The ternary model was made by superpositioning of the crystal structure of rat FcRn in complex with IgG2a Fc (Pdb code 1FRT) onto the hFcRn-HSA complex from the ZDOCK docking, followed by replacement of rat IgG2a Fc with the corresponding human IgG1 Fc (Pdb code 116x). The crystal model of the ternary hIgG1-hFcRn-HSA complex was designed using PyMOL (DeLano Scientific) and is shown in two orientations. The hFcRn HC in green,  $\beta 2m$  in gray, and the three HSA  $\alpha$ -helical domains DI in pink, DII in orange and DIII in cyan/blue. The HSA DIII is split into DIIIa (cyan) and DIIIb (blue). The two domains ( $C_{H2}$  and  $C_{H3}$ ) of half of the IgG1 Fc molecule are shown in maroon.

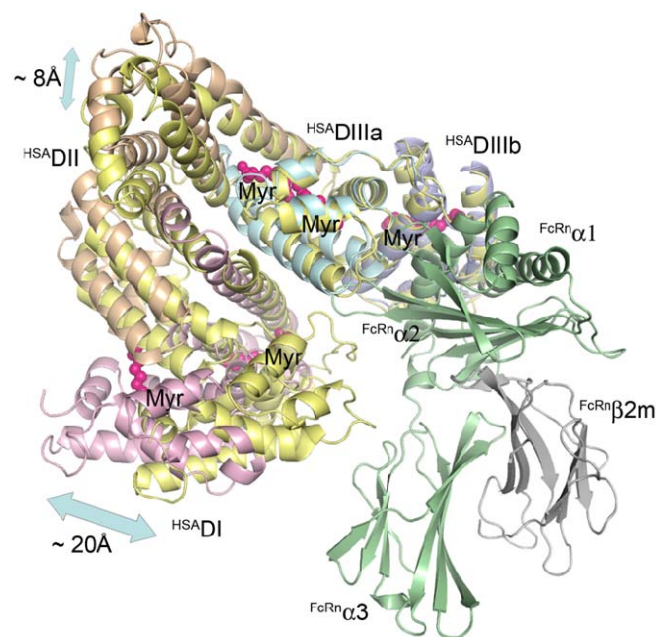

**Supplementary Figure S8. Predicted conformational change in HSA-hFcRn upon binding of fatty acids.** The docked HSA without fatty acids (yellow) binds to the  $\alpha 1$  and  $\alpha 2$  domains of hFcRn (green) mainly via HSA DIII and DI. Upon binding of fatty acids (5 myristate (Myr) molecules shown in magenta spheres), DI (pink) and DII (orange) undergoes a larger conformational change relative to DIII (cyan/blue), with up to 20Å displacements. HSA DI moves away from hFcRn. The crystal structure figure was designed using PyMOL (DeLano Scientific) with the crystallographic data of HSA as previously described (Pdb codes 1bm0 and 1bj5). The hFcRn HC is shown in green and  $\beta 2m$  in gray.



**Supplementary Table S1. Secondary structural elements determined by CD**

| HSA variant | Structural elements pH 7.4 |              |          |           |             | Structural elements pH 6.0 |              |          |           |             |
|-------------|----------------------------|--------------|----------|-----------|-------------|----------------------------|--------------|----------|-----------|-------------|
|             | Helix                      | Antiparallel | Parallel | Beta turn | Random coil | Helix                      | Antiparallel | Parallel | Beta turn | Random coil |
| WT          | 72                         | 0            | 0,7      | 7,3       | 20          | <b>64,8</b>                | 0,5          | 1,7      | 10,1      | 22,4        |
| D494N       | 65,6                       | 0,4          | 1,7      | 10,3      | 22          | <b>67,9</b>                | 0,2          | 1,4      | 9,3       | 21,2        |
| D494A       | 62,2                       | 1,4          | 2,5      | 12,7      | 21,2        | <b>65,9</b>                | 0,5          | 1,7      | 10,3      | 21,7        |
| E495Q       | 65,3                       | 0,3          | 1,7      | 10,4      | 22,2        | <b>65</b>                  | 0,6          | 1,8      | 10,5      | 22,1        |
| E495A       | 64,8                       | 0,5          | 1,8      | 10,6      | 22,2        | <b>65,1</b>                | 0,5          | 1,7      | 10,5      | 22,2        |
| D494Q       | 66,1                       | 0,3          | 1,6      | 10,1      | 21,8        | <b>67,1</b>                | 0,3          | 1,5      | 9,5       | 21,6        |

**Supplementary Table S2. CLUSTAL multiple amino acid alignment of albumin sequences**

|         |                                                                                  |     |
|---------|----------------------------------------------------------------------------------|-----|
| human   | DAHKSEVAHRFKDLGEEENFKALVLI AFAQYLQQCPFEHDVKL VNEVTEFAKT CVADES                   | 60  |
| dog     | EAYKSEIAHRYNDLGEEHFRLV LVAFSQYLQQCPFEHDVKL VKEVTEFAKACAAEESGA                    | 60  |
| sheep   | DTHKSEIAHRFNLDGEEENFQGLV LIAFSQYLQQCPFEHDVKL VKELTEFAKT CVADES                   | 60  |
| goat    | DTHKSEIAHRFNLDGEEENFQGLV LIAFSQYLQQCPFEHDVKL VKELTEFAKT CVADES                   | 60  |
| cattle  | DTHKSEIAHRFKDLGEEHFGLV LIAFSQYLQQCPFEHDVKL VNELTEFAKT CVADES                     | 60  |
| Donkey  | DTHKSEIAHRFNLDGEEKHFKGLV LVAFSQYLQQCPFEHDVKL VNEVTEFAK KCAADES                   | 60  |
| Rabbit  | EAHKSEIAHRFNDVGEEHFI GLVLI TFSQYLQKCPYEEHAKL VKEVTDL AKACVADES                   | 60  |
| mouse   | EAHKSEIAHRYNDLGEQHFKGLV LIAFSQYLQKCSYDEHAKL VQEVTDFAKT CVADES                    | 60  |
| rat     | EAHKSEIAHRFKDLGEGHFKGLV LIAFSQYLQKCPYEEHAKL VQEVTDFAKT CVADES                    | 60  |
| Hamster | DAHKSEIAHRFKDLGEGHFKGLV LIAFSQYLQKCPYEEHAKL VNEVTDFAKT CVADES                    | 60  |
| Guinea  | EAHKSEIAHRFNLDGEGHFKGLV LITLSQHLQKSPFEEHVKL VNEVTDFAKACVADES                     | 60  |
|         | :.:***:***:*.:.:** :* .***:***:**.:.:** **.*:***:*** **:**.                      |     |
| human   | NCDKSLHTLFGDKLCTVATLRETYGEMADCCAKQEPERNECFLQHKDDNP NLPRLVRPEV                    | 120 |
| dog     | NCDKSLHTLFGDKLCTVASLRD KYGDMADCC EKQEPERNECFLAHKDDNPGFP LVAPEP                   | 120 |
| sheep   | GCDKSLHTLFGDELCKVATLRETYGDMADCC EKQEPERNECFLNHKDDSPDL PKLK-PEP                   | 119 |
| goat    | GCDKSLHTLFGDELCKVATLRETYGDMADCC EKQEPERNECFLKHKDDSPDL PKLK-PEP                   | 119 |
| cattle  | GCEKSLHTLFGDELCKVASLRETYGDMADCC EKQEPERNECFLSHKDDSPDL PKLK-PDP                   | 119 |
| Donkey  | NCDKSLHTLFGDKLCTVATLRATY GELADCC EKQEPERNECFLTHKDDHPNL PKLK-PEP                  | 119 |
| Rabbit  | NCDKSLHDFGDKLCAIP NLRDNYGELADCC TKQEPERNECFLQHKDDNPL PPFERPEA                    | 120 |
| mouse   | NCDKSLHTLFGDKLCAIP NLRDNYGELADCC TKQEPERNECFLQHKDDNPL PPFERPEA                   | 120 |
| rat     | NCDKSIHTLFGDKLCAIP KLRDNYGELADCC AKQEPERNECFLQHKDDNPL PPFERPEA                   | 120 |
| Hamster | NCDKSLHTLFGDKLCAIP TLRDNYGELADCC AKQEPERNECFLKHKDDHPNL PPFVRPDA                  | 120 |
| Guinea  | NCGKAIATLFGDKVCAIP SLRETYGELADCC AKEDPDRVECF LQHKDDNPL PPFERPEP                  | 120 |
|         | * ** : : : : : : * : : * . * : : * * * * * : * : * * * * * * * * * * * : * : *   |     |
| human   | DVMCTAFHDNEETF LKKYLYE IARRHPYFYAPELLFFAKRYKA AFTECCQAADKAAACL LP                | 180 |
| dog     | DALCAAFQDNEQLF LKGYLYE IARRHPYFYAPELLYYAQQYKGVFAECCQAADKAACL GP                  | 180 |
| sheep   | DTLCAEFKADEK KFWGKYLYE VARRHPYFYAPELLYYANKYNGVVFQECCQAEDKGACL LP                 | 179 |
| goat    | DTLCAEFKADEK KFWGKYLYE VARRHPYFYAPELLYYANKYNGVVFQECCQAEDKGACL LP                 | 179 |
| cattle  | NTLCDEFKADEK KFWGKYLYE IARRHPYFYAPELLYYANKYNGVVFQECCQAEDKGACL LP                 | 179 |
| Donkey  | DAQCAAFQEDPD KFLGKYLYE VARRHPYFYGPPELLFHAEEYKADFTECCPADDKAGCL IP                 | 179 |
| Rabbit  | DVLCKAFHDDEK AFFGHYLYE VARRHPYFYAPELLYYA QYKA I L TECC EAADK GACL TP             | 180 |
| mouse   | EAMCTSFKENPTTFM GHYLHEVARRHPYFYAPELLYYAEQYNE I L TQC CAEADK E SCL TP             | 180 |
| rat     | EAMCTSFKENPT SFLGHYLHEVARRHPYFYAPELLYYAEKYNEVL TQCTESDKAACL TP                   | 180 |
| Hamster | EAMCTS FQENAVTFM GHYLHEVARRHPYFYAPELLYYAEK YSAI MTCECGEADKACITP                  | 180 |
| Guinea  | EALCTAFKENNDRFI GHYLVEVSRRHPYFYAPELLYYAEKYKNALTECC EAADK AACL TP                 | 180 |
|         | : . * * : : * : : * : : * : : * : : * : : * : : * : : * : : * : : * : : * : : *  |     |
| human   | KLDELREDEGKASSAQR LK CASLQK FGERAFKAWAVARLSQRFPKAEFAEVSKLVTDLTK                  | 240 |
| dog     | KIEALREKVLSSAKERFKCASLQKFGDRAFKAWSVARLSQRFPKADFAEISKVVTDLTK                      | 240 |
| sheep   | KIDAMREKVLASSARQLR LRCASIQKFGERALKAWSVARLSQKFPKADFTDVT KIVTDLTK                  | 239 |
| goat    | KIETMREKVLASSARQLR LRCASIQKFGERALKAWSVARLSQKFPKADFTDVT KIVTDLTK                  | 239 |
| cattle  | KIETMREKVLASSARQLR LRCASIQKFGERALKAWSVARLSQKFPKAEFVEVTKLVTDLTK                   | 239 |
| Donkey  | KLDALKERILLSSAKERLKC S S FQKFGERA FKAWSVARLSQKFPKADFAEVSKI VTDLTK                | 239 |
| Rabbit  | KLDALLEGKSLISAAQER LRCASIQKFGERAYKAWALVRLSQRFPKADFTDISKIVTDLTK                   | 240 |
| mouse   | KLDGVKEKALVSSVRQRMK C S S M QK FGERAFKAWAVARLSQTFPNADFAEITK LATDLTK              | 240 |
| rat     | KLDAVKEKALVA VRQRMKCS S M Q R FGERAFKAWAVARMSQRFPNAEFAEITK LATDLTK               | 240 |
| Hamster | KLDALKEKALASVNRQLR LKCS S L Q R FGERAFKAWAVARMSQKFPKADFAEITK LATDLTK             | 240 |
| Guinea  | KLD AIKEKALVSSAQQLR LK CASLQK FGERAFKAWSVARLSQKFPKAEFAEISTIVTSLTK                | 240 |
|         | * : : . . : : . : : : * : : * : : * * : : . * : * * * : : * : : . : * . * * *    |     |
| human   | VHTECCHGDLLECADDRADLAKYI CENQDSISSKLKECC EKP LLEKSHCIAEVENDEMPA                  | 300 |
| dog     | VHKECCHGDLLECADDRADLAKYMCENQDSISTKLKECCDKPVLEKSQCLAEVERDELPG                     | 300 |
| sheep   | VHKECCHGDLLECADDRADLAKYI CDHQDALSSKLKECCDKPVLEKSHCIAEVDKDAVPE                    | 299 |
| goat    | VHKECCHGDLLECADDRADLAKYI CDHQDTLSSKLKECCDKPVLEKSHCIAEIDKDAVPE                    | 299 |
| cattle  | VHKECCHGDLLECADDRADLAKYI CDNQDTISSKLKECCDKPVLEKSHCIAEVEKD A I P E                | 299 |
| Donkey  | VHKECCHGDLLECADDRADLTKYICEHQDSISGKLKACCDKPLLQKSHCIAEVKEDD LPS                    | 299 |
| Rabbit  | VHKECCHGDLLECADDRADLAKYMCEHQETISSHLKECCDKP ILEKAHC IYGLHNDETPA                   | 300 |
| mouse   | VNKECCHGDLLECADDRAELAKYMCENQATISSKLQTCDDKPLLKKAHCLSEVEHDTMPA                     | 300 |
| rat     | INKECCHGDLLECADDRAELAKYMCENQATISSKLQACCDKPV LKQSQCLAIEIHDNIPA                    | 300 |
| Hamster | LTEECCHGDLLECADDRAELAKYMCENQASISSKLQACCDKPV LK KSHCLSEVENDDLPA                   | 300 |
| Guinea  | VTKECCHGDLLECADDRQELAKYMCHEQDSISSKLKECCV K P T L Q K A H C I L E I Q R D E L P T | 300 |
|         | : * * * * * * * * * * * * * * * * * * * * * * * * * * * * * * * * * * * * * * *  |     |
| human   | DLPSLAADFV ESKDVCKNYAEAKDVFLGMFLY EYARRHPDYSVVL LRLAKTYETTLEKC                   | 360 |
| dog     | DLPSLAADFV EDKEVCKNYQEA KD VFLGTFLYEYARRHP EYSVSL LRLAKEYEATLEKC                 | 360 |

sheep NLPPLTADFAEDKEVCKNYQEAKDVFLGSLFLYEYSRRHPEYAVSVLLRLAKEYEATLEDC 359  
goat NLPPLTADFAEDKEVCKNYQEAKDVFLGSLFLYEYSRRHPEYAVSVLLRLAKEYEATLEDC 359  
cattle NLPPLTADFAEDKDVCKNYQEAKDAFLGSLFLYEYSRRHPEYAVSVLLRLAKEYEATLEEC 359  
Donkey DLPALAADFAEDKEICKHYKDAKDVFLGTFLEYYSRRHPDYSVSLLLRIAKTYEATLEKC 359  
Rabbit GLPAVAEEFVEDKDVCKNYEAKDLFLGKFLYEYSRRHPDYSVLLRLGKAYEATLKKC 360  
mouse DLPALAADFVEDQEVCKNYAEAKDVFLGTFLEYYSRRHPDYSVSLLLRLAKKYEATLEKC 360  
rat DLPALAADFVEDKEVCKNYAEAKDVFLGTFLEYYSRRHPDYSVSLLLRLAKKYEATLEKC 360  
Hamster DLPALAADFVEDKEVCKNYAEAKDVFLGTFLEYYSRRHPDYSVLLRLAKKYEATLEKC 360  
Guinea ELPDLAVDFVEDKEVCKNFAEAKDVFLGTFLEYYSRRHPEYSIGMLLRIAKGYEAKLEKC 360  
\*\* :: :\*. \* . : : : : : : : : : : : : : : : : : : : : : : : : : : : : : : : : : : : \*

human CAAADPHECYAKVFDEFKPLVEEPQNLIKQNCLEFQGEYKFNALLVRYTKKVPQVST 420  
dog CATDDPPTCYAKVLDKFKPLVEEPQNLVKTNCLEFQGEYKFNALLVRYTKKAPQVST 420  
sheep CAKEDPHACYATVFDKLLKHLVDEPQNLIKKNCLEFQKHGEYGFQNALIVRYTRKAPQVST 419  
goat CAKEDPHACYATVFDKLLKHLVDEPQNLIKKNCLEFQKHGEYGFQNALIVRYTRKAPQVST 419  
cattle CAKDDPHACYSTVFDKLLKHLVDEPQNLIKQNCDFEKLGEYGFQNALIVRYTRKVPQVST 419  
Donkey CAEADPPACYATVFDQFTPLVEEPKSLVKKNCDFEEVGEYDFQNALIVRYTRKAPQVST 419  
Rabbit CATDDPHACYAKVLDKFKPLVEEPKLVKQNCLEFQGEYKFNALLVRYTKKVPQVST 420  
mouse CAEADPPACYGTVLAEFQPLVEEPKLVKQNCLEFQGEYKFNALLVRYTKKAPQVST 420  
rat CAEADPPACYGTVLAEFQPLVEEPKLVKQNCLEFQGEYKFNALLVRYTKKAPQVST 420  
Hamster CAEADPPACYGTVLAEFQPLVEEPKLVKQNCLEFQGEYKFNALLVRYTKKAPQVST 420  
Guinea CAEADPHACYAKVFDELQPLIDEPKLVQNCLEFQGEYKFNALLVRYTKKAPQVST 420  
\*\* :\* \*\* . \* . : : : : : : : : : : : : : : : : : : : : : : : : : : : : : : \*

human PTLVEVSRNLGKVGSKCKHPEAKRMPCAEDYLSVVLNQLCVLHEKTPVSDRVTKCCTES 480  
dog PTLVEVSRKLGKVGTKCKKPESESRMCAEDYLSVVLNQLCVLHEKTPVSEKVTKCCSES 480  
sheep PTLVEISRSLGKVGTKCKKPESESRMCTEDYLSLILNRLCVLHEKTPVSEKVTKCCTES 479  
goat PTLVEISRSLGKVGTKCKKPESESRMCTEDYLSLILNRLCVLHEKTPVSEKVTKCCTES 479  
cattle PTLVEVSRSLGKVGTRCCTKPESESRMCTEDYLSLILNRLCVLHEKTPVSEKVTKCCTES 479  
Donkey PTLVEIGRTLKVGSRCKLPESESRMPCSENHLALALNRLCVLHEKTPVSEKVTKCCTES 479  
Rabbit PTLVEISRSLGKVGSKCKHPEAERLPCVEDYLSVVLNQLCVLHEKTPVSEKVTKCCSES 480  
mouse PTLVEAARNLGRVGTCKCCTLPEDQRLPCVEDYLSAILNRVCLLHEKTPVSEKVTKCCSGS 480  
rat PTLVEAARNLGRVGTCKCCTLPEDQRLPCVEDYLSAILNRVCLLHEKTPVSEKVTKCCSGS 480  
Hamster PTLVEAARNLGRVGTCKCCTLPEDQRLPCVEDYLSAILNRVCLLHEKTPVSEKVTKCCSGS 480  
Guinea PTLVEYARKLGSVGTCKCCLPETERLSCTENYLALILNRLCILHEKTPVSEKVTKCCTES 480  
\*\*\*\*\* . \* . \* . \* . \* . \* . \* . \* . \* . \* . \* . \* . \* . \* . \* . \* . \* . \* . \* . \* . \* . \* . \*

human LVNRRPCFSALEVDETYVPKEFNAETFTFFHADICTLSEKERQIKKQATLVELVKHKPKAT 540  
dog LVNRRPCFSGLEVDETYVPKEFNAETFTFFHADICTLPEAEKQVKKQATLVELLKHKPKAT 540  
sheep LVNRRPCFSDLTLDETYVPKPFDEKFFTFHADICTLPDTEKQIKKQATLVELLKHKPKAT 539  
goat LVNRRPCFSDLTLDETYVPKPFDEKFFTFHADICTLPDTEKQIKKQATLVELLKHKPKAT 539  
cattle LVNRRPCFSALEVDETYVPKAFDEKLFTHADICTLPDTEKQIKKQATLVELLKHKPKAT 539  
Donkey LAERRPCFSALELDEGYIPKEFKAETFTFFHADICTLPDTEKQIKKQATLVELLKHKPKAT 539  
Rabbit LVDRRPCFSALGPFDETYVPKEFNAETFTFFHADICTLPETERKIKKQATLVELVKHKPHAT 540  
mouse LVERRPCFSALETVDETYVPKEFKAETFTFFHSDICTLPEKEKQIKKQATLVELVKHKPKAT 540  
rat LVERRPCFSALETVDETYVPKEFKAETFTFFHSDICTLPEKEKQIKKQATLVELVKHKPKAT 540  
Hamster VVERRPCFSALEPVDETYVPKEFKAETFTFFHADICSLPEKEKQMKKQALVELVKHKPKAT 540  
Guinea LVNRRPCFSALEHVDETYVPKPFHADSFTFFHADICTLPEKEKQVKKQALVELVKHKPKAS 540  
: . : \*\*\*\*\* \* \*\* \* : \* \* . . \*\*\*\*\* : \* : \* : \* : \* : \* : \* : \* : \* : \* : \*

human KEQLKAVMDDFAAFVEKCKKADDKETCFEAEGKLVAAASQAALGL 585  
dog DEQLKTVMGDFGAFVEKCCCAENKEGCFSEEGPKLVAAAQAALV- 584  
sheep DEQLKTVMENFVAFVDKCCAADDKEGCFVLEGPKLVASTQAALA- 583  
goat DEQLKTVMENFVAFVDKCCAADDKEGCFVLEGPKLVASTQAALA- 583  
cattle EEQLKTVMENFVAFVDKCCAADDKEACFAVEGPKLVVSTQTALA- 583  
Donkey KEQLKTVLGNFSAFVAKCCGAEDKEACFAEGPKLVASSQLALA- 583  
Rabbit NDQLKTVVGEFTALLDKCCSAEDKEACFAVEGPKLVESKATLG- 584  
mouse AEQLKTVMDDFAQFLDTCCKAADKDTCFSTEGPNLVTRCKDALA- 584  
rat EDQLKTVMGDFAQFVDKCCAADDKDNCFATEGPNLVARSKEALA- 584  
Hamster GFQLRVTVLGEFTAFLDKCCSAEDKEACFSEDGPKLVASSQAALA- 584  
Guinea EEQMKTVMGDFAAFLKCCDADNKEACFTEDGPKLVAKCQATLA- 584  
\* : : : : : \* : : . \* \* \* : : \* \* : \* : \* \* : : \* \* : : \*

**Supplementary Table S3. HSA plasmids**

| <b>HSA mutein</b> | <b>Sub-cloning plasmid</b> | <b>Disintegration plasmid</b> |
|-------------------|----------------------------|-------------------------------|
| Wild type         | pDB2243                    | pDB2244                       |
| D494N             | pDB3876                    | pDB3887                       |
| D494A             | pDB3877                    | pDB3888                       |
| E495Q             | pDB3878                    | pDB3889                       |
| E495A             | pDB3879                    | pDB3890                       |
| D494Q             | pDB3880                    | pDB3891                       |
| D494N, T496A      | pDB3881                    | pDB3892                       |
| T496A             | pDB3882                    | pDB3893                       |

**Supplementary Table S4. HSA plasmids**

| <b>Amino acid substitution in HSA</b> | <b>Plasmid</b> |
|---------------------------------------|----------------|
| HSA H440Q                             | pDB3986        |
| HSA H464Q                             | pDB3987        |
| HSA H510Q                             | pDB3988        |
| HSA H535Q                             | pDB3989        |
| HSA Q417A                             | pDB4084        |
| HSA P499A                             | pDB4085        |
| HSA K500A                             | pDB4086        |
| HSA K536A                             | pDB4087        |
| HSA P537A                             | pDB4088        |
| HSA E501A                             | pDB4108        |
| HSA K568*                             | pDB4557        |

\* = a stop codon was engineered into the DNA sequence encoding HSA to terminate the polypeptide sequence at amino acid 567.
